# Supplementary material for: Immunostimulatory effects of Bacillus subtilis -fermented garlic (Aglio): an in-depth in vitro and in vivo analysis
Source: Royal Society of Chemistry journal article supplement (doi:10.1039/d4fo03598d), 2024-01-01
Supplement: d4fo03598d1.pdf [file d4fo03598d1.pdf]

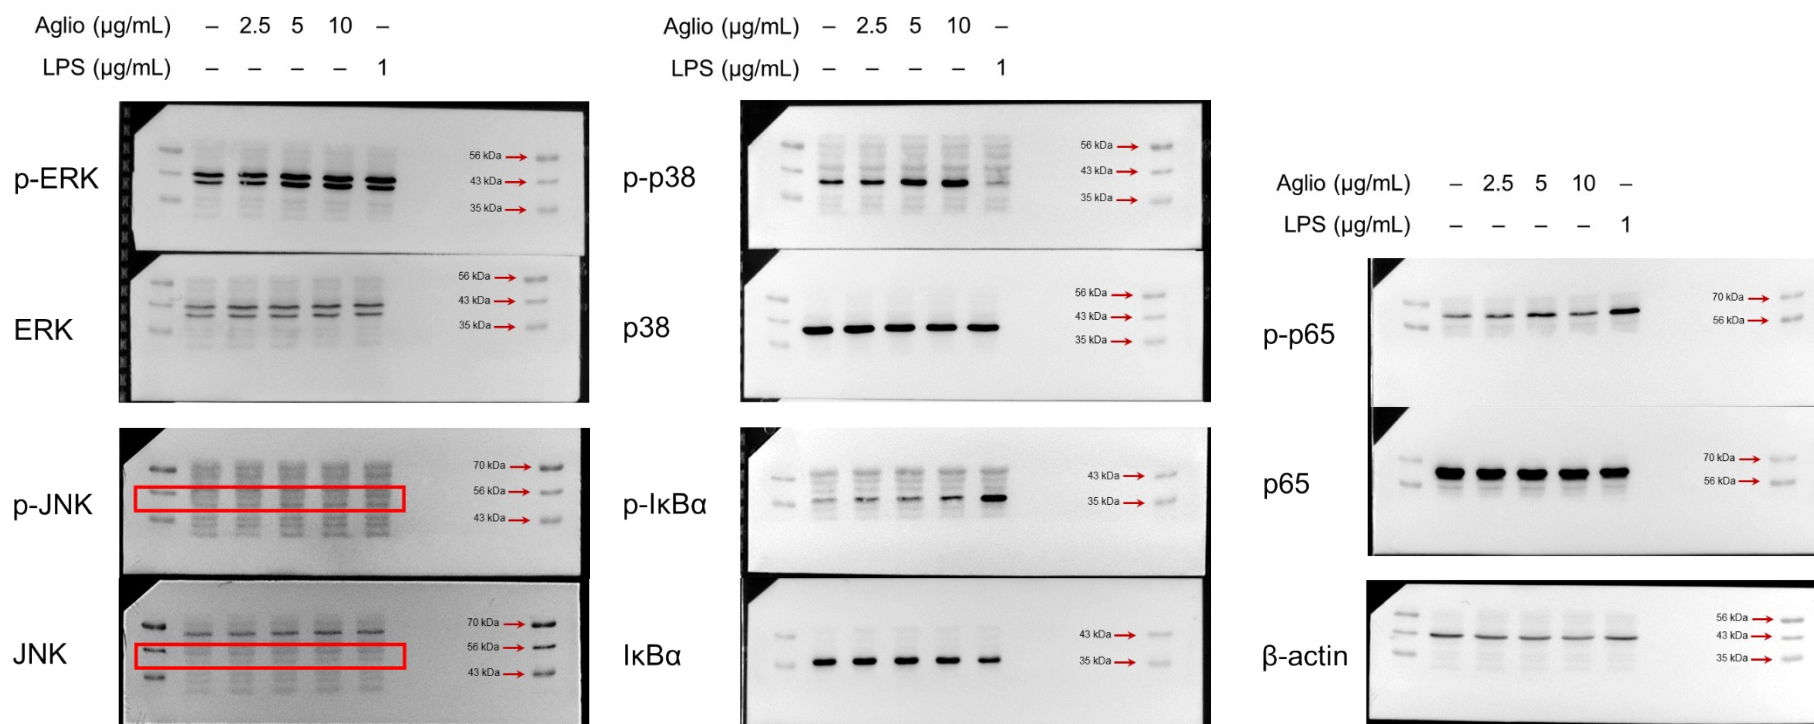

**Fig. S1.** The original western blotting images provided in Fig. 2A.

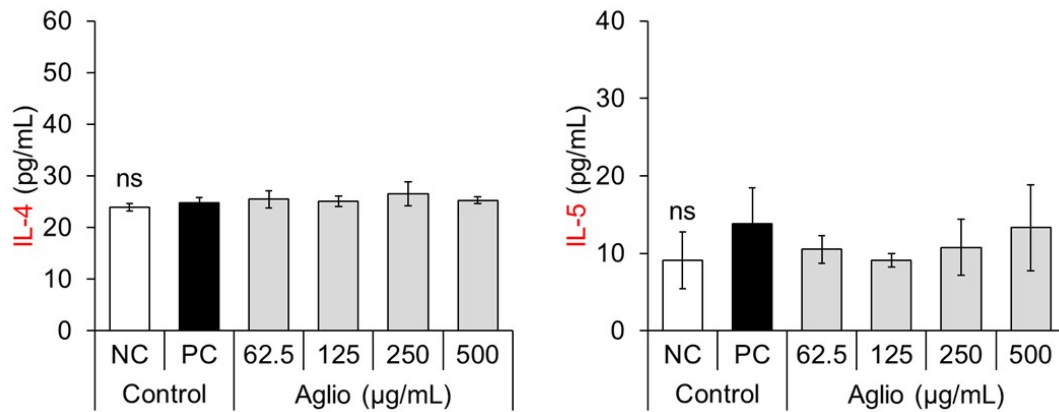

**Fig. S2. Effects of Aglio on allergic-related cytokines production.** Splenocytes from normal Balb/c mice were treated with Aglio for 48 h, with SFM and LPS (1 µg/mL) serving as negative and positive controls (NC and PC), respectively. Cytokine production in the culture supernatant was quantified using ELISA kits. Data represent the mean ± standard deviation of three independent experiments. ns, not significantly different ( $p > 0.05$ ) among groups according to Duncan's test.

A)

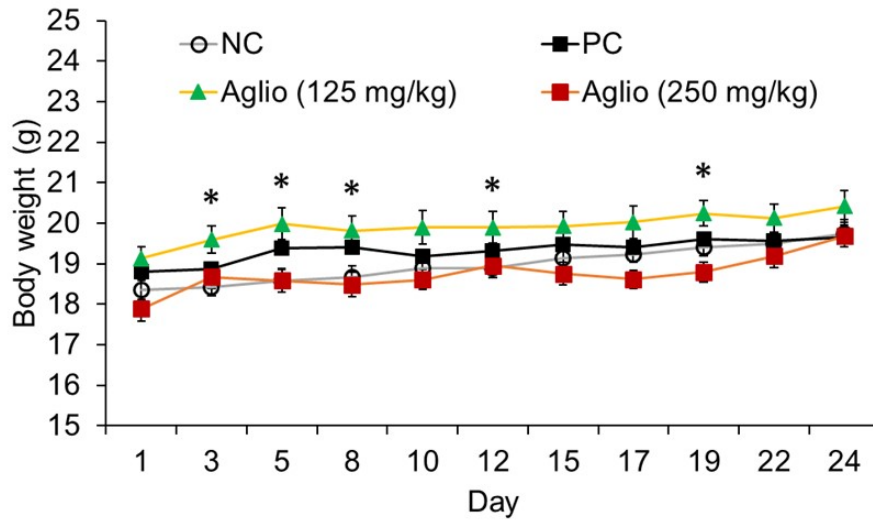

B)

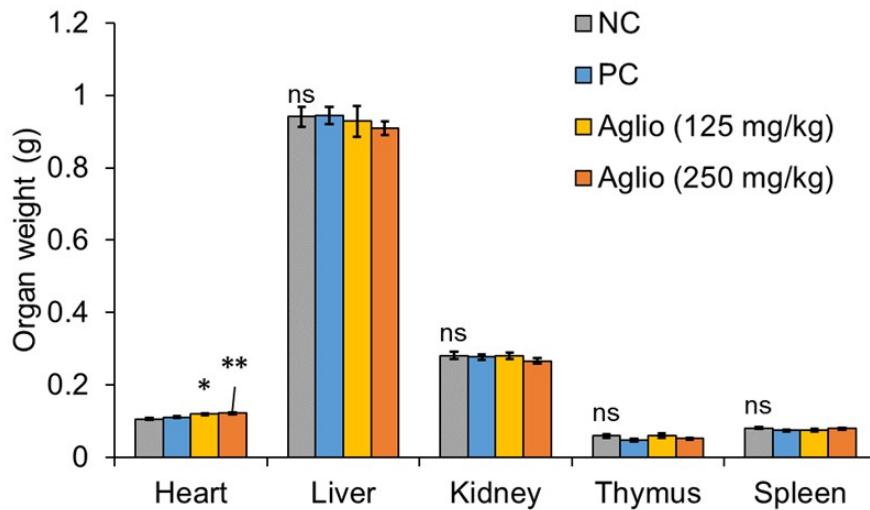

**Fig. S3. (A) Effects of oral Aglio administration on (A) body weight during period and (B) major organ weight after euthanasia.** Aglio was orally administered to Balb/c mice at specified doses for four weeks. Purified water and levamisole hydrochloride (50 mg/kg) were administered serving as negative and positive controls (NC and PC), respectively. Data represent the mean  $\pm$  standard error of mean ( $n = 8$ ). The asterisks show significant differences between the NC and each group according to Student's *t*-test at a *p* value of  $< 0.05$ . ns, not significant among groups.

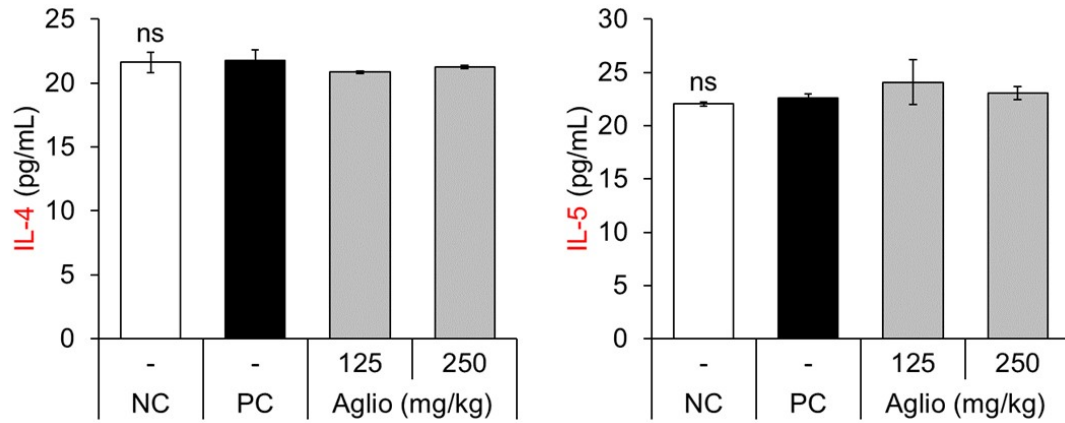

**Fig. S4. Effects of oral Aglio administration on allergic-related cytokines production.** Aglio was orally administered to Balb/c mice at specified doses for four weeks. Purified water and levamisole hydrochloride (50 mg/kg) were administered serving as negative and positive controls (NC and PC), respectively. After euthanasia, splenocytes were isolated, incubated aseptically for 48 h, and quantified for cytokine and antibody production in the cultured supernatant using ELISA kits. Data represent the mean  $\pm$  standard error of mean ( $n = 8$ ). ns, not significantly different ( $p > 0.05$ ) among groups according to Duncan's test.

**Table S1.** The information of the ELISA kits used in the study

---

| <b>Antibody</b>               | <b>Cat. No.</b> | <b>Company</b>                        |
|-------------------------------|-----------------|---------------------------------------|
| Mouse MCP-1 ELISA kit         | 555260          | BD Biosciences (Minneapolis, MN, USA) |
| Mouse TNF- $\alpha$ ELISA kit | 88-7324-88      | Invitrogen (Carlsbad, CA, USA)        |
| Mouse IL-6 ELISA kit          | 555240          | BD Bioscience (Minneapolis, MN, USA)  |
| Mouse IL-12 ELISA kit         | 555165          | BD Biosciences (Minneapolis, MN, USA) |
| Mouse GM-CSF ELISA kit        | 555167          | BD Biosciences (Minneapolis, MN, USA) |
| Mouse IFN- $\gamma$ ELISA kit | 555138          | BD Biosciences (Minneapolis, MN, USA) |
| Mouse total IgG ELISA kit     | 88-50400-88     | Invitrogen (Carlsbad, CA, USA)        |
| Mouse IgA ELISA kit           | 88-50450-88     | Invitrogen (Carlsbad, CA, USA)        |
| Mouse IL-4 ELISA kit          | 555232          | BD Biosciences (Minneapolis, MN, USA) |
| Mouse IL-5 ELISA kit          | 555236          | BD Biosciences (Minneapolis, MN, USA) |

---

**Table S2.** Gene-specific primer sequences used in this study

| <b>Primer name</b> | <b>Forward<br/>Reverse</b> | <b>Sequence (5'→3')</b>                                   |
|--------------------|----------------------------|-----------------------------------------------------------|
| <i>T-Bet</i>       | Forward<br>Reverse         | 5'-CCAGAACGCAGAGATCACTCA-3'<br>5'-CGAGGGGACACTCGTATCAA-3' |
| <i>GATA3</i>       | Forward<br>Reverse         | 5'-GGGCTGTACTACAAGCTTCAT-3'<br>5'-ATCTTCCGGTTTCGGGTCTG-3' |
| <i>FOXP3</i>       | Forward<br>Reverse         | 5'-GCCACCTGGAAGAATGCCA-3'<br>5'-GTCCACACTGCTCCCTTCTC-3'   |
| <i>β-Actin</i>     | Forward<br>Reverse         | 5'-CCTCGCCTTTGCCGATCC-3'<br>5'-CGCGGCGATATCATCATCC-3'     |

**Table S3.** The information of the antibodies used in the study

| <b>Antibody</b>                                           | <b>Cat. No.</b> | <b>Company</b>                                         |
|-----------------------------------------------------------|-----------------|--------------------------------------------------------|
| p38 MAPK antibody                                         | #9212           | Cell signaling (Danvers, MA, USA)                      |
| JNK (56G7) Rabbit mAb                                     | #9258           | Cell signaling (Danvers, MA, USA)                      |
| P44/42 MAPK (Erk1/2)                                      | #9101           | Cell signaling (Danvers, MA, USA)                      |
| IKB $\alpha$ (44D4) Rabbit mAb                            | #4812           | Cell signaling (Danvers, MA, USA)                      |
| NF- $\kappa$ B p65 (D14E12) XP <sup>®</sup><br>Rabbit mAb | #8242           | Cell signaling (Danvers, MA, USA)                      |
| p-p38<br>(Thr180/Tyr182) MAPK                             | #9211           | Cell signaling (Danvers, MA, USA)                      |
| p-SAPK/JNK<br>(Thr183/Tyr185)                             | #9251           | Cell signaling (Danvers, MA, USA)                      |
| p-44/42 MAPK (Erk1/2)<br>(Thr202/Tyr204)                  | #9101           | Cell signaling (Danvers, MA, USA)                      |
| p-IKB $\alpha$ (Ser32) (14D4)<br>Rabbit mAb               | #2859           | Cell signaling (Danvers, MA, USA)                      |
| p- NF- $\kappa$ B (Ser536) (93H1)<br>Rabbit mAb           | #3033           | Cell signaling (Danvers, MA, USA)                      |
| $\beta$ -actin (C4)                                       | sc-47778        | Santa Cruz Biotechnology Inc.<br>(Santa Cruz, CA, USA) |
| Anti-mouse IgG, HRP-linked                                | #7076           | Cell signaling (Danvers, MA, USA)                      |
| Anti-rabbit IgG, HRP-linked                               | #7074           | Cell signaling (Danvers, MA, USA.)                     |
